# Supplementary material for: PGE2 production at sites of tissue injury promotes an anti-inflammatory neutrophil phenotype and determines the outcome of inflammation resolution in vivo
Source: PubMed Central journal article supplement (PMC6124908; doi:10.1126/sciadv.aar8320), 2018-09-05
Supplement: aar8320_SM.pdf [file aar8320_SM.pdf]

## Supplementary Materials for

### **PGE<sub>2</sub> production at sites of tissue injury promotes an anti-inflammatory neutrophil phenotype and determines the outcome of inflammation resolution in vivo**

Catherine A. Loynes, Jou A. Lee, Anne L. Robertson, Michael JG. Steel, Felix Ellett, Yi Feng, Bruce D. Levy, Moira K.B. Whyte, Stephen A. Renshaw\*

\*Corresponding author. Email: s.a.renshaw@sheffield.ac.uk

Published 5 September 2018, *Sci. Adv.* 4, eaar8320 (2018)  
DOI: 10.1126/sciadv.aar8320

#### **This PDF file includes:**

Fig. S1. Reverse transcription PCR demonstrates successful exon deletion.

Fig. S2. PGE<sub>2</sub> drives resolution of inflammation in the absence of macrophages by 12 hpi and does not alter neutrophil apoptosis.

Fig. S3. Amino acid positions 353 and 418 determine LOX functionality.

Fig. S4. Genotyping method for *ptges* crispant.

## Supplementary Materials

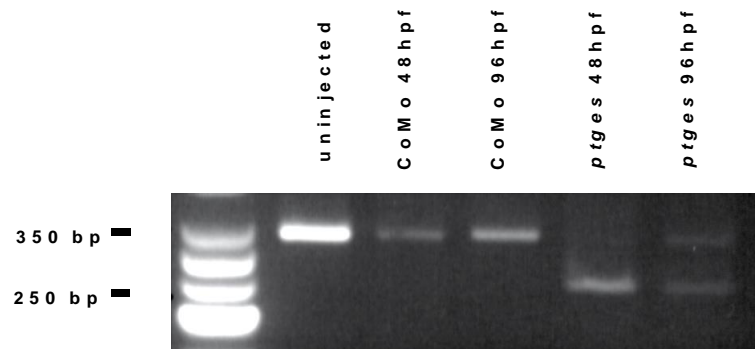

**Fig. S1. Reverse transcription PCR demonstrates successful exon deletion.** Gel electrophoresis showing almost complete knockdown of *ptges* at 48 and partial knockdown remaining at 96 hpf. A splice variant missing exon 2 in *ptges* morphants of 250bp compared to a WT product of 350bp is visible.

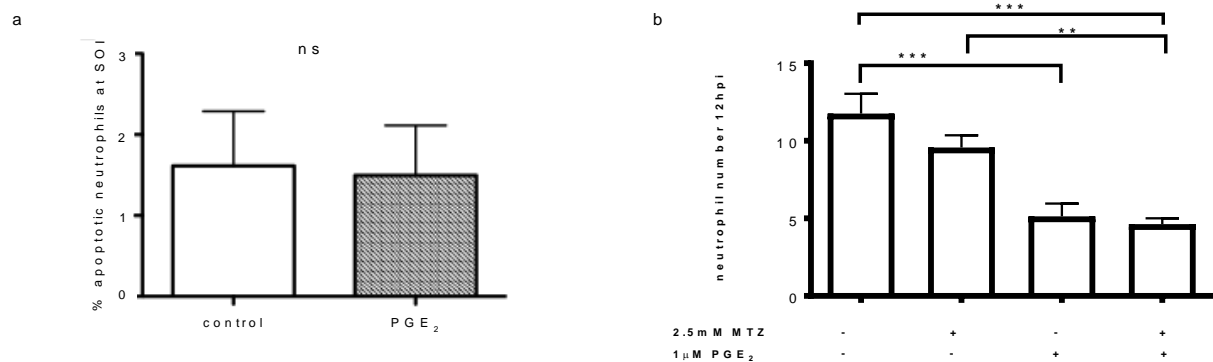

**Fig. S2. PGE<sub>2</sub> drives resolution of inflammation in the absence of macrophages by 12 hpi and does not alter neutrophil apoptosis.** (A) Graph showing PGE<sub>2</sub> does not affect neutrophil apoptosis during inflammation resolution. Larvae were injured, treated with PGE<sub>2</sub> and fixed at 12 hpi for TSA and TUNEL staining. The percentage of apoptotic neutrophils at the site of injury was not altered by the addition of PGE<sub>2</sub>, n=36, from 2 experimental repeats. (B) Neutrophil counts 12 hpi in 3 dpf *Tg(mpx:EGFP)i114;Tg(cfms:Gal4)i186;Tg(UAS:nfsB-mCherry)i149* larvae treated with and without 2.5mM metronidazole and 1μM PGE<sub>2</sub>. PGE<sub>2</sub>, added at 8 hpi, can significantly drive inflammation resolution by 12 hpi, even when

macrophages are still being recruited to the site of injury in control larvae or in their complete absence when treated with metronidazole.

|           |                                                                |     |
|-----------|----------------------------------------------------------------|-----|
| Medalox12 | -HPDDGLIPIAIIQLEQT--PGLDTPIFLPSDPPLAWLLAKMWRHAEFQVFPQLLSHLLRT  | 396 |
| Zfalox12  | -HPEKGLIPIAIIQLEQK--PDKDTPVFLPSDPPLAWLLAKMWRHAEFQVFPQLLSHLLRT  | 371 |
| Cfalox12  | -HPESGLIPIAIIQLEQN--PGKDTPIFLPNDPPLAWLLAKMWRHAEFQVFPQLLSHLLRT  | 370 |
| Halox12   | -EPNGKLPQPMVIQIQPPNPSSPTTFLFLPSDPPLAWLLAKSWVRNSDFOLHEIQYHLLNT  | 364 |
| Malox12   | -DPGGKLLPMAIQIQPPNPSSPAPTFLFLPSDPPLAWLLAKIWRVNSDFOLQELQFHLLNT  | 364 |
| Malox15   | -QPDGQLLPPIAIIQLELPKGTGTPPPIFTPLDPPMDWLLAKCWVRSSDLOLHELQAHLLRG | 365 |
| Ralox12   | -QPDGKLLPMPVIQLHLPKIGSSPPPLFLPTDPPMVWLLAKCWVRSSDLOVHELNSHLLRG  | 365 |
| Ralox15   | QQPSTVGLVICLELHLPKIGSSPPPLFLPTDPPMVWLLAKCWVRSSDFOVHELNSHLLRG   | 495 |
| Halox15   | -QPDGKLLPMPVIQLQLPRTGSPPLFLPTDPPMAWLLAKCWVRSSDFOLHELQSHLLRG    | 364 |
| Palox15   | -QPDGKLLPMPVIQLQLPHEGSPLPPLFLPTDPPMVWLLAKCWVRSSDFOLHELHSHLLRG  | 365 |
| Malox8    | SSGSGPLLPPIAIIQLKQT--PGPDNPIFLPSDDTDWLLAKTWRVNSDFYIHEAVTHLLHA  | 378 |
| Medalox15 | MNPEGKLMPLAIQLNQK--ASAENPIFLPTDPEKDWLLAKLFFKSADLLECEVVHLLIT    | 388 |
|           | : : : . . : * * * * * : : : : * * *                            |     |
| Medalox12 | HLVVEVFCVATLRQLPAVHPIYKLLAPHQRYTLEINCRGRTQLLSETGIFKRVVSTGGEG   | 456 |
| Zfalox12  | HLMVEVICVATLRQLPAVHPIYKLLTPHLRYTLEINCRGRTQLLSEPIGIFKRVVSTGGEG  | 431 |
| Cfalox12  | HLVVEVICVSTLRHLPAVHPIYKLLTPHLRYTLEINCRGRTQLISPEGIFKRVVSTGGTG   | 430 |
| Halox12   | HLVAEVI AVATMRCLPGLHPIFKFLIPHIRYTMETRARTQLISDGGIFDQAVSTGGGG    | 424 |
| Malox12   | HLVAEVI AVATMRCLPGLHPIFKLLVPHIRYTMETRARTQLISDGGIFDQAVSTGGGG    | 424 |
| Malox15   | HLVAEVFAVATMRCLPSVHPVFKLLVPHLLYTMETRARTQLISERGFDFKVMSTGGGG     | 425 |
| Ralox12   | HLMAEVFTVATMRCLPSIHPVFKLIVPHRYTLEINVRARNGLVSDFGIFDQIMSTGGGG    | 425 |
| Ralox15   | HLMAEVFTVATMRCLPSIHPVFKLIVPHRYTLEINVRARNGLVSDFGIFDQIMSTGGGG    | 555 |
| Halox15   | HLMAEVI VVATMRCLPSIHPFKLIPHLRYTLEINVRARTGLVSDMGIFDQIMSTGGGG    | 424 |
| Palox15   | HLMAEVI AVATMRCLPSIHPFKLIPHPRYTLEINVRARNGLVSDLGIFDQAVSTGGGG    | 425 |
| Malox8    | HLIPEVFALATLRQLPCHPLFKLLIPHIRYTLHINTLARELLVAPGKLIDKSTGLGTGG    | 438 |
| Medalox15 | HFLSEVFAVATLRCPFTIHPHLKLLIPHRFTLHINIMGREALLGPDGALC-ASSFGLGEG   | 447 |
|           | * : : * * : : * * * * : : * * * : : * * * . * * : : * * *      |     |

**Fig. S3. Amino acid positions 353 and 418 determine LOX functionality.** Alignments of mammalian and fish 12- and 15-LO proteins. A Phenylalanine (F) at position 353 (magenta box) in reference to rabbit 12-LO, and a bulky amino acid Valine (V) at position 418 (green box) dictates preferential oxygenation at carbon 15, indicating zebrafish 12-LO functions as a 15-LO lipoxygenase.

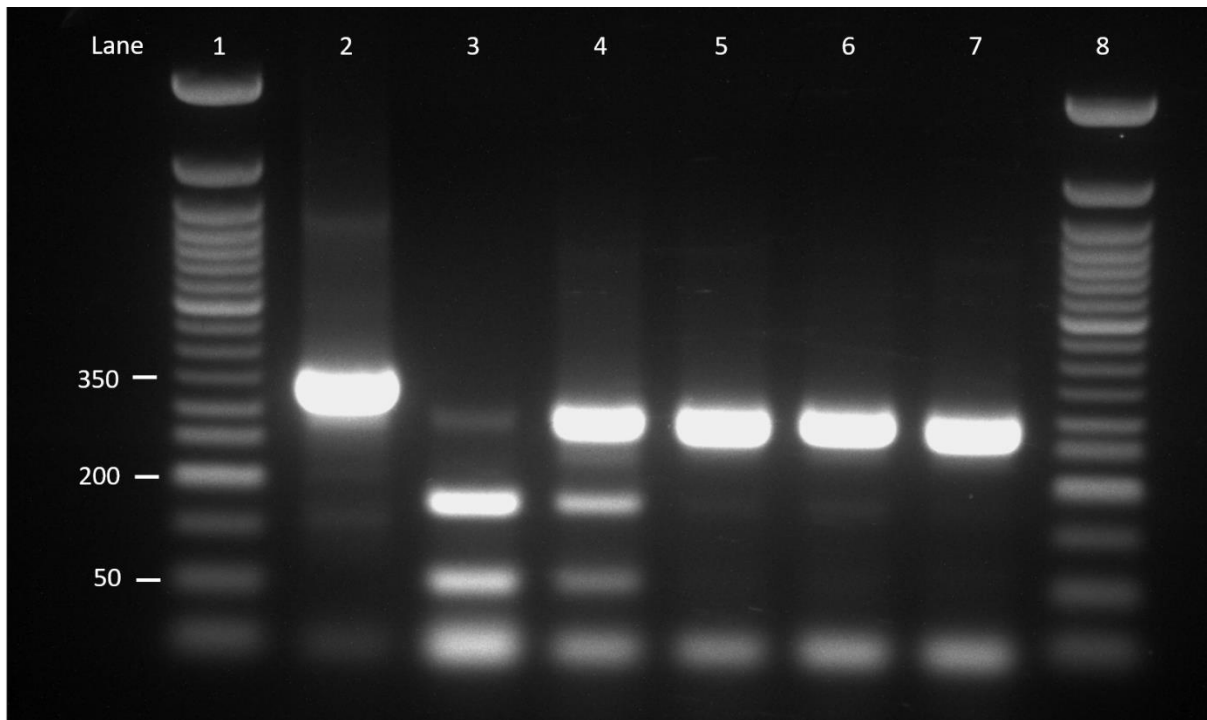

**Fig. S4. Genotyping method for *ptges* crisprant.** Electrophoresis gel shows different genotypes from *ptges* CRISPR injection. Lane 1: NEB 50bp ladder. Lane 2: undigested PCR product 345bp. Lane 3: fully cut WT 184bp, 109bp and 52bp. Lane 4: Heterozygous CRISPRant with 293bp band, 184bp, 109bp and 52bp. Lane 5-7: Homozygous CRISPRants with 293bp and 52bp bands. Very weak 184bp and 109bp bands can be seen, indicating a small amount of WT *ptges* is still present, allowing for normal development in these almost complete knockdown CRISPRant larvae. Lane 8: NEB 50bp ladder.
